# Supplementary material
Source: PubMed Central journal article supplement (PMC8387336)
Supplement: NIHMS1670718-supplement-1.pdf [file NIHMS1670718-supplement-1.pdf]

## Table of Contents

### Supplementary Figures

- Fig. S1** | Characterization of primary dermal fibroblast-like cells.
- Fig. S2** | DNA microarray analysis of dermal cells treated with FR medium for 2 days.
- Fig. S3** | Chemical-induced myotube formation from dermal cells at different passages.
- Fig. S4** | Slow-adhering cell population contributes to the expanded CiMCs.
- Fig. S5** | Characterization of skeletal muscle MHC expression in CiMCs.
- Fig. S6** | Myogenic expansion and differentiation potential of CiMCs at different passages.
- Fig. S7** | Chemical cocktail induced myogenesis from transgenic Pax7-CreER:Rosa26-EYFP dermal cells.
- Fig. S8** | Gating strategy for FACS of EYFP<sup>-</sup> and EYFP<sup>+</sup> cells.
- Fig. S9** | Chemical-induced myogenic expansion in adult dermal cells (DC) and MuSCs.
- Fig. S10** | Chemical-induced myogenic expansion of adult MuSCs.
- Fig. S11** | scRNA-seq analysis of chemical-treated dermal cells and endogenous MuSCs.
- Fig. S12** | scRNA-seq analysis reveals heterogeneous cell identities.
- Fig. S13** | *In vivo* analysis of CiMCs transplantation in CTX-injured adult, aged and mdx mice.
- Fig. S14** | Drug-loaded nanoparticles induce *in vitro* myogenesis.
- Fig. S15** | Nanoparticle distribution in TA muscles after injection.
- Fig. S16** | FR-np promotes muscle regeneration by suppressing fibrosis and inflammation.

**Supplementary Table S1** | Primer sequences for RT-qPCR analysis.

**Captions for supplementary videos S1–4.**

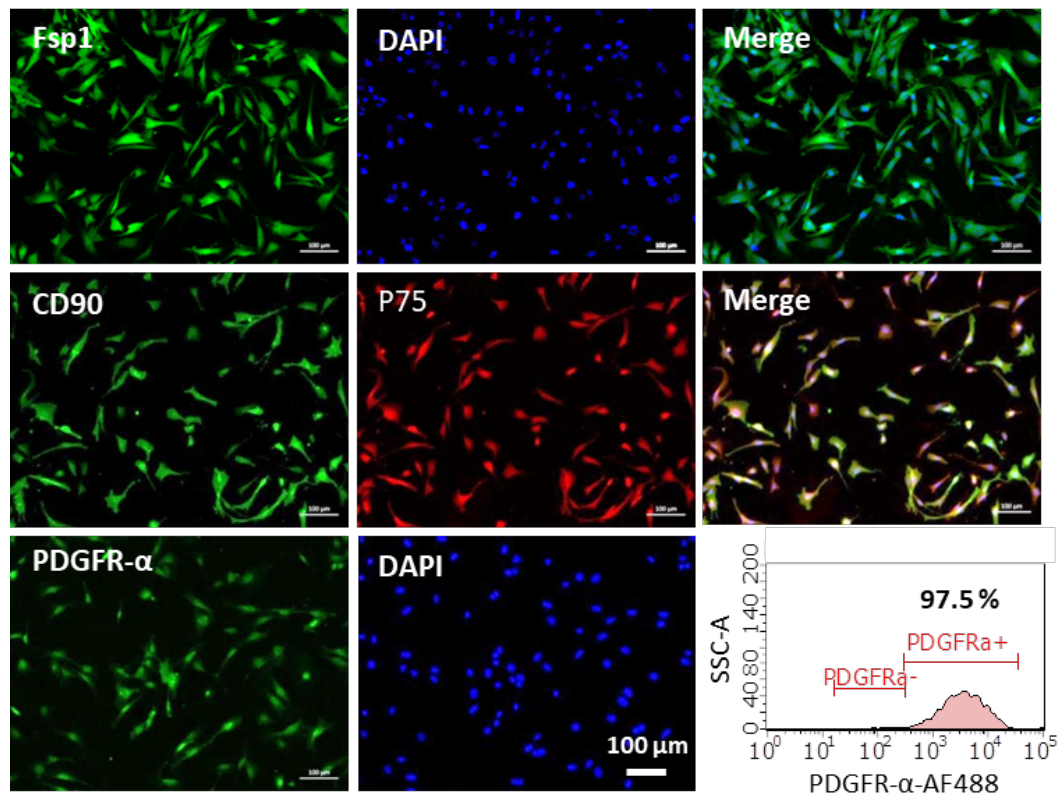

**Fig. S1 | Characterization of primary dermal fibroblast-like cells.** Immunofluorescence analysis of fibroblast marker (Fsp1, CD90, P75 and PDGFR-α) expression, and flow-cytometry analysis of PDGFR-α after overnight seeding of dermal cells in Fb medium. All the experiments were performed in triplicate.

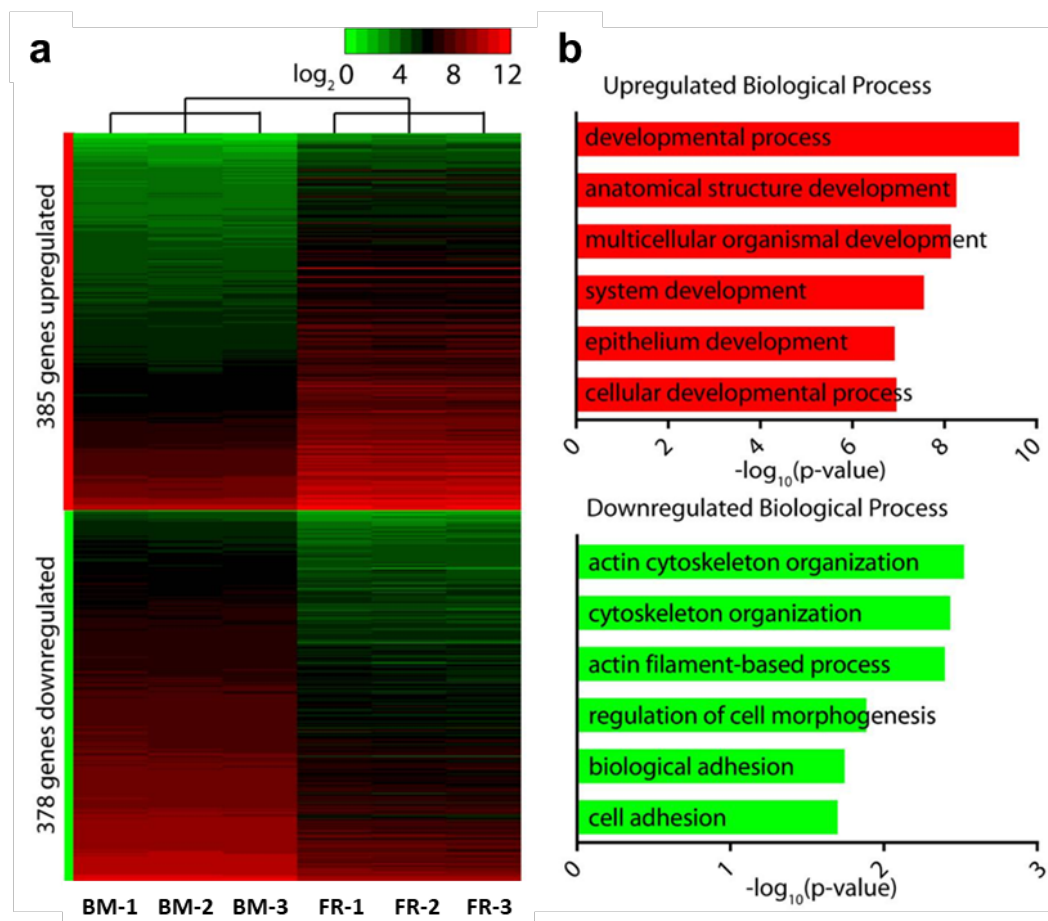

**Fig. S2 | DNA microarray analysis of dermal cells treated with FR medium for 2 days. a,** Heat map of upregulated and downregulated genes ( $> \text{two-fold}$ , FDR-adjusted  $p < 0.05$ ,  $n = 3$ ). **b,** Enriched gene ontology terms for upregulated and downregulated biological processes.

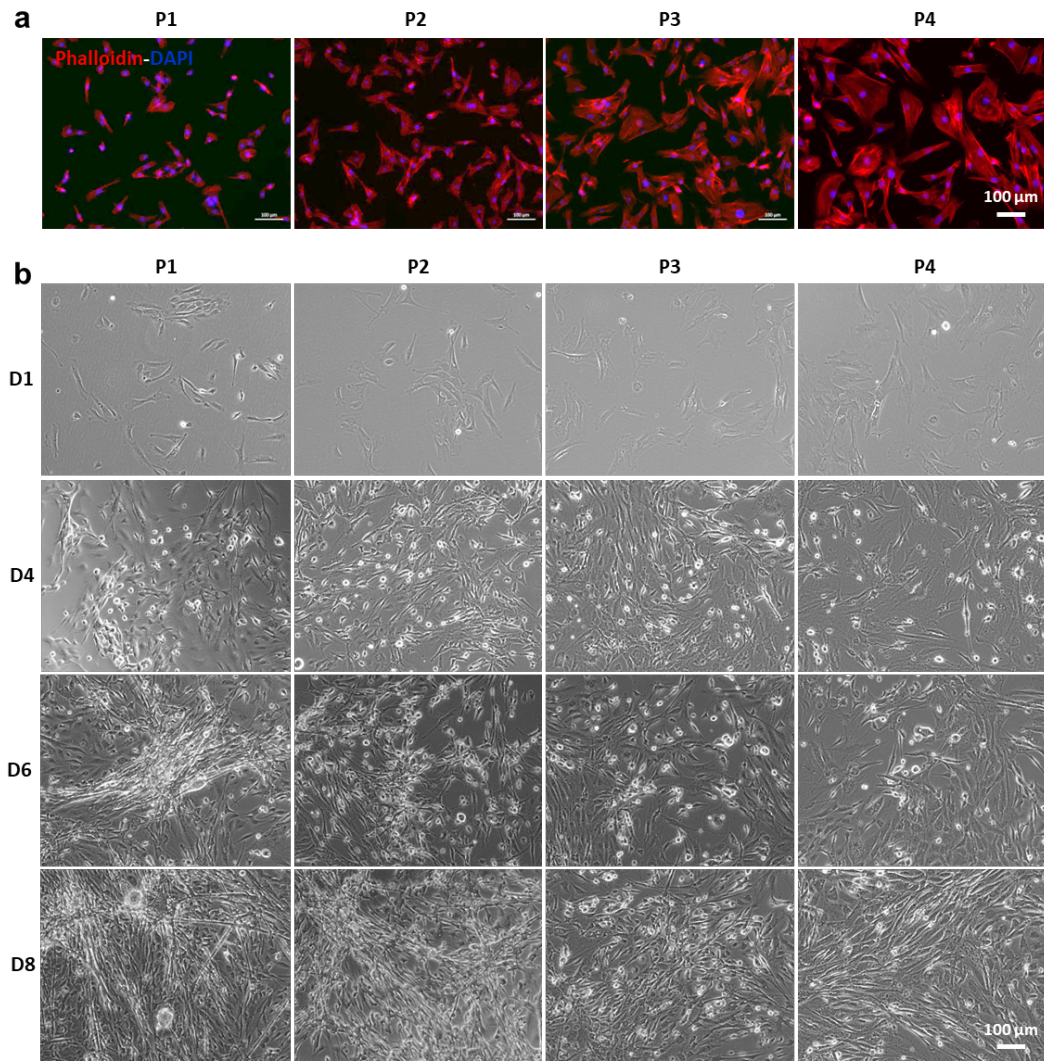

**Fig. S3 | Chemical-induced myotube formation from dermal cells at different passages.** **a**, The morphology of dermal cells at various passages stained with phalloidin and DAPI one day after plating. **b**, Bright-field images show myotube formation in FR medium-treated dermal cells at different passages. All the experiments were performed in triplicate.

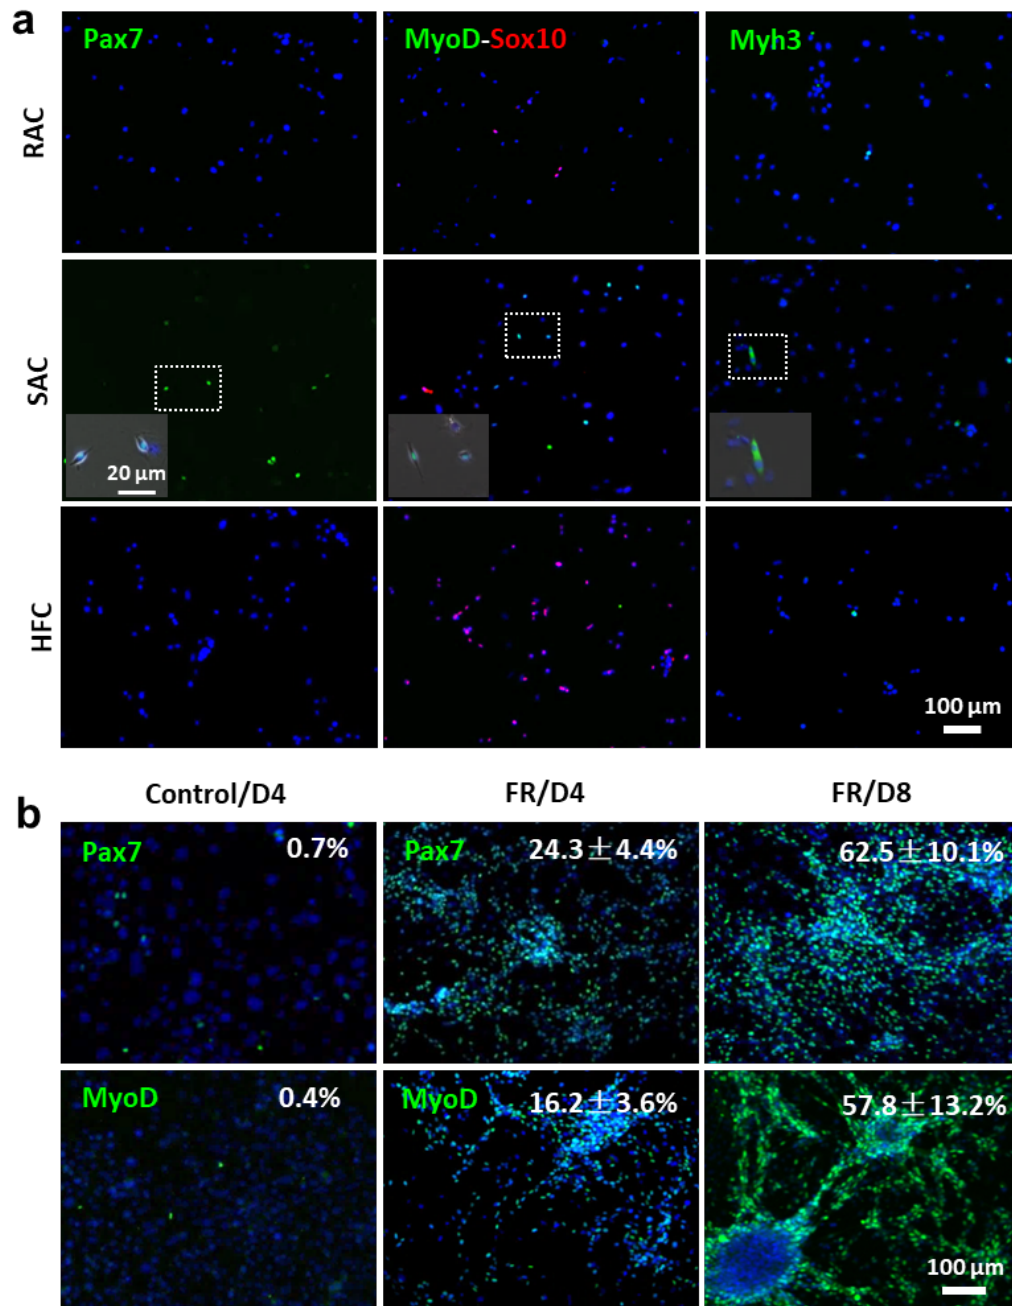

**Fig. S4 | Slow-adhering cell population contributes to the expanded CiMCs.** **a**, Immunofluorescence analysis of skeletal muscle markers (Pax7, MyoD, Myh3) and skin NCSC marker Sox10 in rapidly adhering cells (RACs), slow-adhering cells (SACs) and hair follicle cells (HFCs) after overnight seeding in basic medium. Insets are magnified regions within the white rectangle. **b**, Immunofluorescence staining for Pax7 and MyoD in CiMCs induced from SACs. Numbers denote the percentage of positive cells. All the experiments were performed in triplicate.

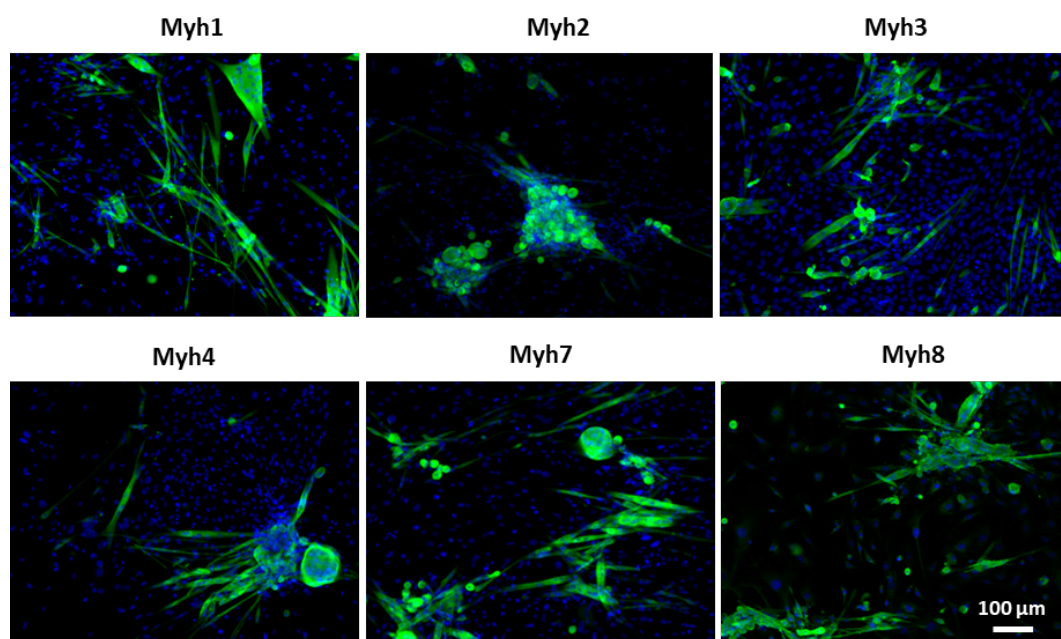

**Fig. S5 | Characterization of skeletal muscle MHC expression in CiMCs.** Cells were treated with the chemical cocktail for 6 days, and stained for myosin heavy chain markers following fixation and permeabilization. All the experiments were performed in triplicate.

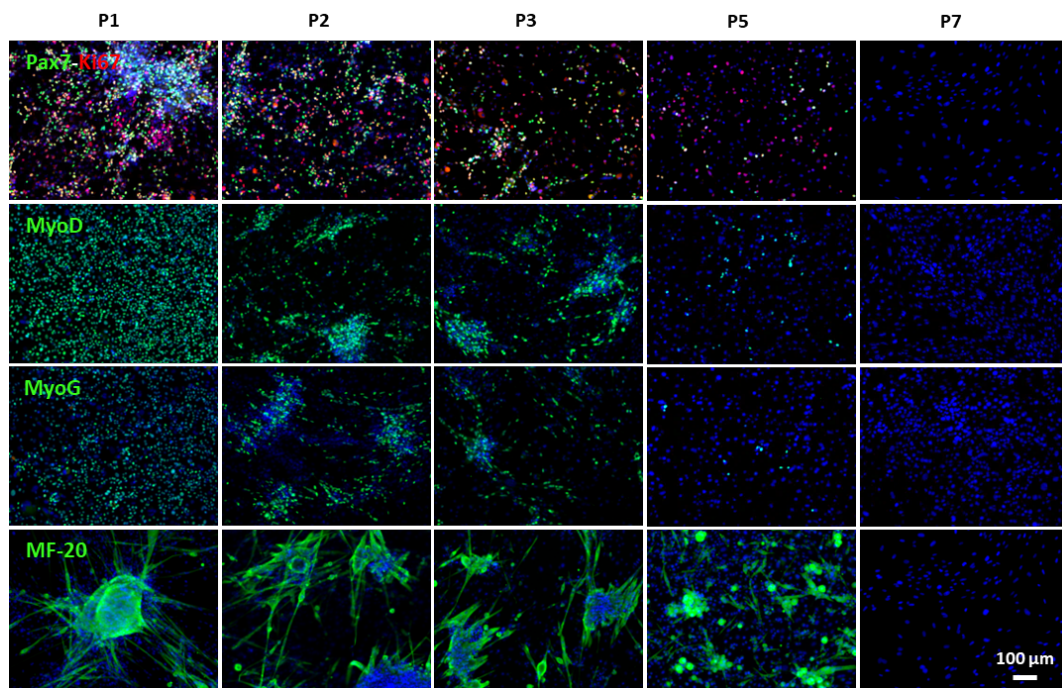

**Fig. S6 | Myogenic expansion and differentiation potential of CiMCs at different passages.** CiMCs were passaged every 3 days in FR medium, and the myogenic ability of CiMCs at different passages was evaluated after 8 days of culture in FR medium. All the experiments were performed in triplicate.

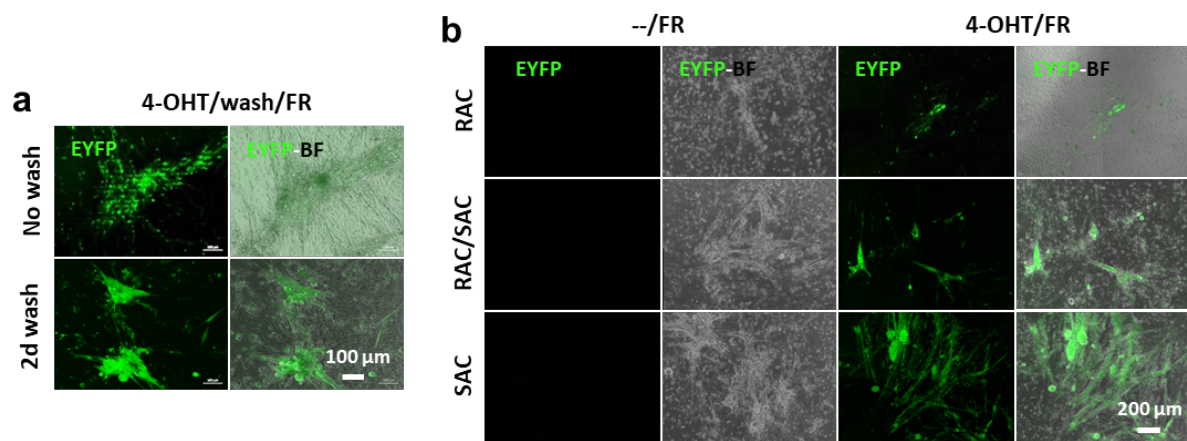

**Fig. S7 | Chemical cocktail induced myogenesis from transgenic Pax7-CreER:Rosa26-EYFP dermal cells.** **a**, Dermal cells from Pax7-CreER:Rosa26-EYFP mice were seeded in basic Fb medium containing 4-OHT for 1 day. The medium was replaced with fresh Fb medium for 2 days, and then changed to FR medium for an additional 8 days. **b**, RACs, RACs/SACs, and SACs of Pax7-CreER:Rosa26-EYFP dermal cells were treated with and without 4-OHT and cultured in FR medium for 8 days. All the experiments were performed in triplicate.

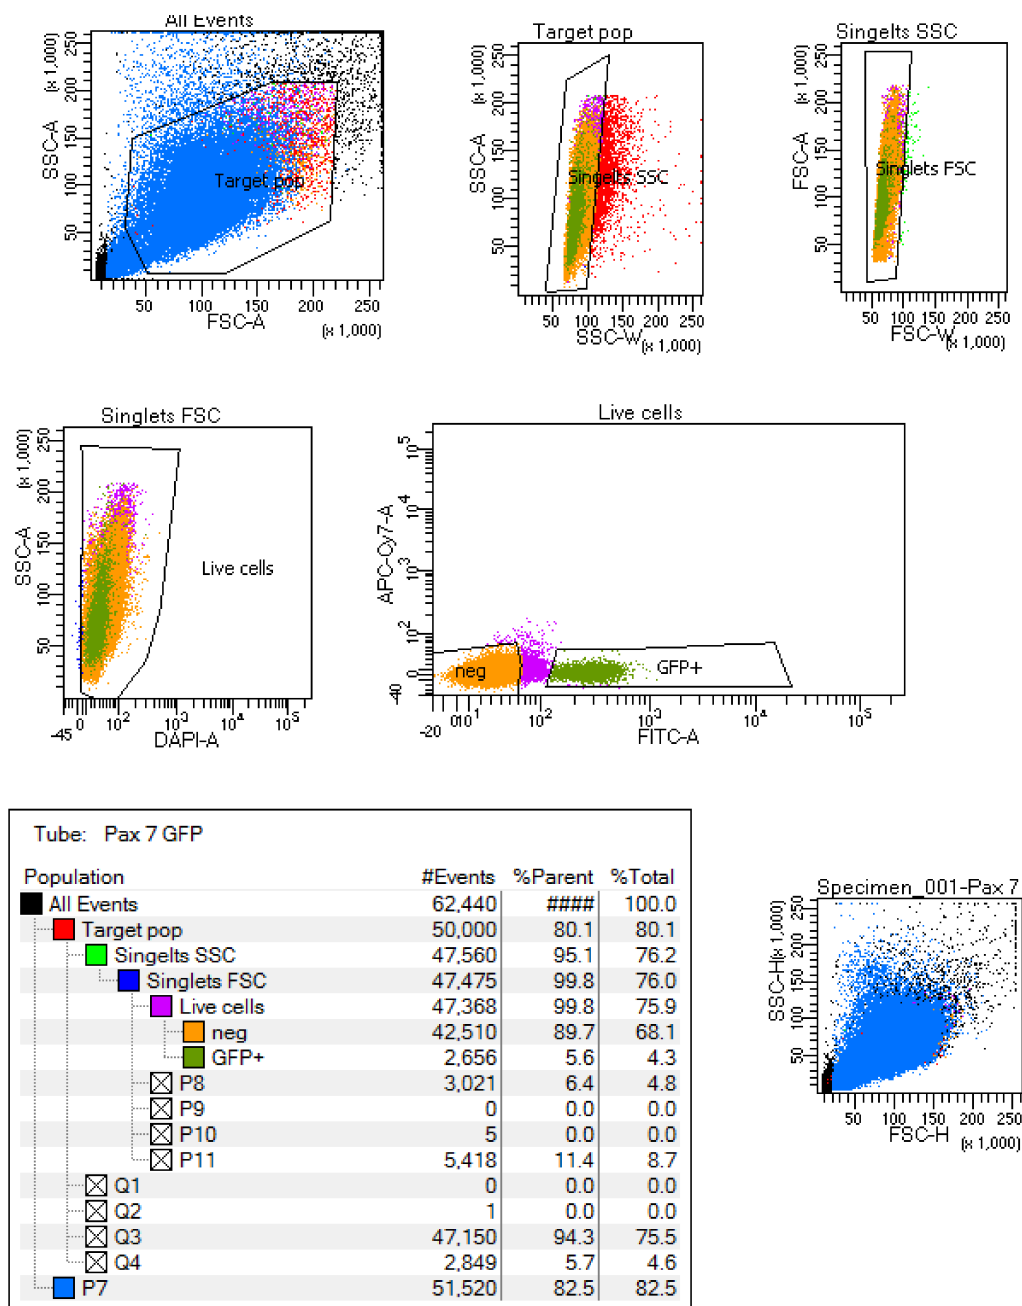

**Fig. S8 | Gating strategy for FACS of EYFP<sup>-</sup> and EYFP<sup>+</sup> cells.** The sorted cells were day 4 Pax7 lineage-tracing CiMCs, by BD FACSDiva Software Version 8.0.2.

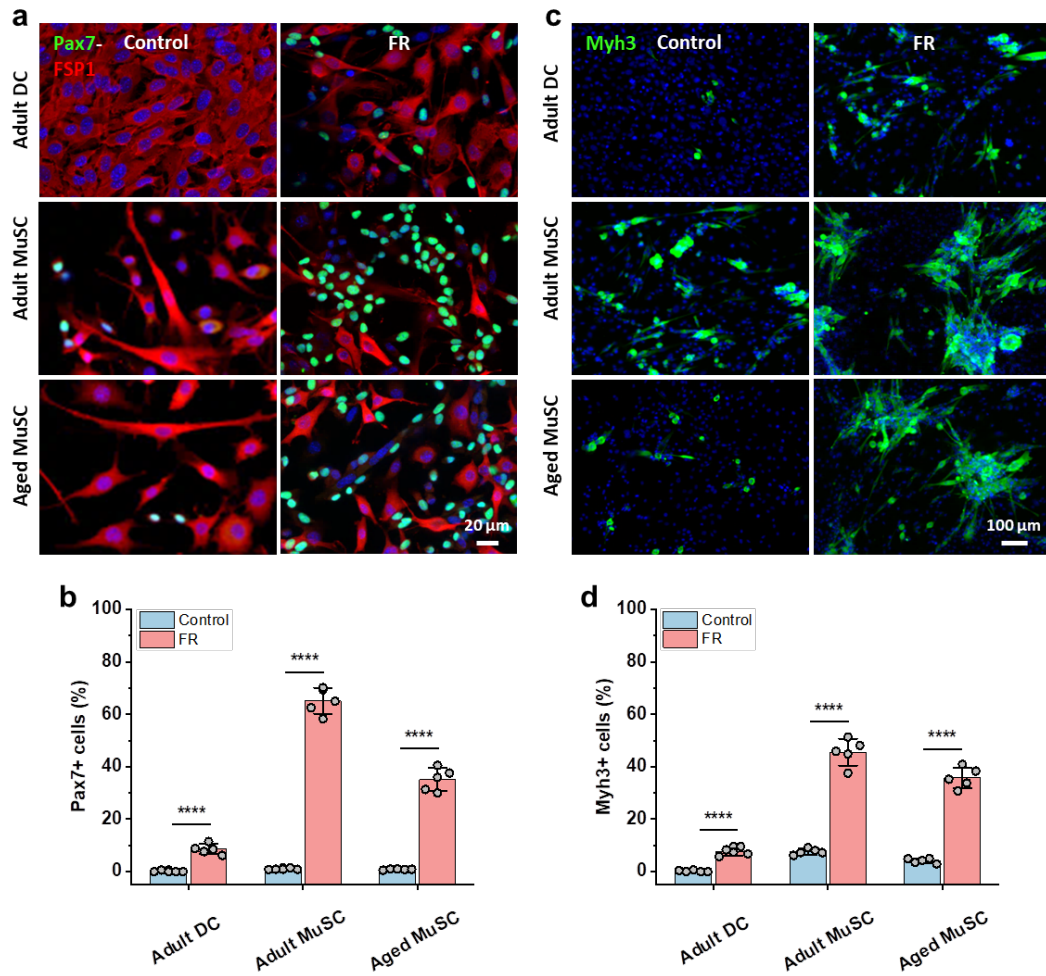

**Fig. S9 | Chemical-induced myogenic expansion in adult dermal cells (DC) and MuSCs.** **a**, Immunofluorescence staining for Pax7 and FSP1 in adult DCs, and adult and aged MuSCs at D8 in control Fb media (left panels) and FR media (right panels). **b**, Percentage of Pax7<sup>+</sup> cells in (**a**) ( $n = 5$  samples per group). **c**, Immunofluorescence staining for Myh3 in adult dermal cells and adult and aged MuSCs at D8 in control Fb media (left panels) and FR media (right panels). **d**, Percentage of Myh3<sup>+</sup> cells in (**c**) ( $n = 5$  samples per group). Data are presented as mean  $\pm$  SD. Two-tailed Student's t-test. \*\*\*\* $P < 0.0001$ .

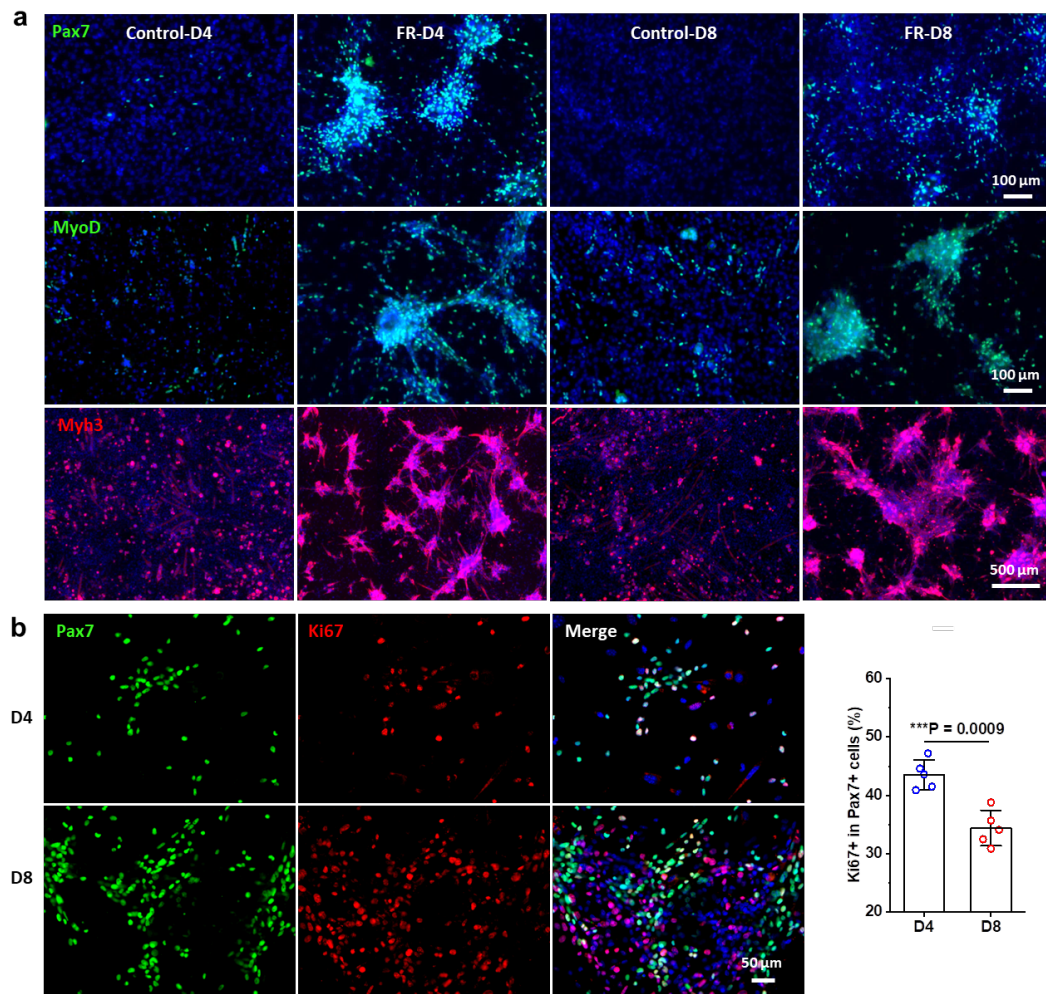

**Fig. S10 | Chemical-induced myogenic expansion of adult MuSCs.** **a**, Immunofluorescence staining for Pax7, MyoD and Myh3 in mouse adult MuSCs treated with control Fb media or FR media for 4 days and 8 days ( $n = 3$  samples per group). **b**, Immunofluorescence staining for Pax7-Ki67 in CiMCs expanded from adult mouse MuSCs and the percentage of proliferating Pax7<sup>+</sup> cells based on Ki67 expression ( $n = 5$  samples per group). Data are presented as mean  $\pm$  SD. Two-tailed Student's t-test. \*\*\* $P < 0.001$ .

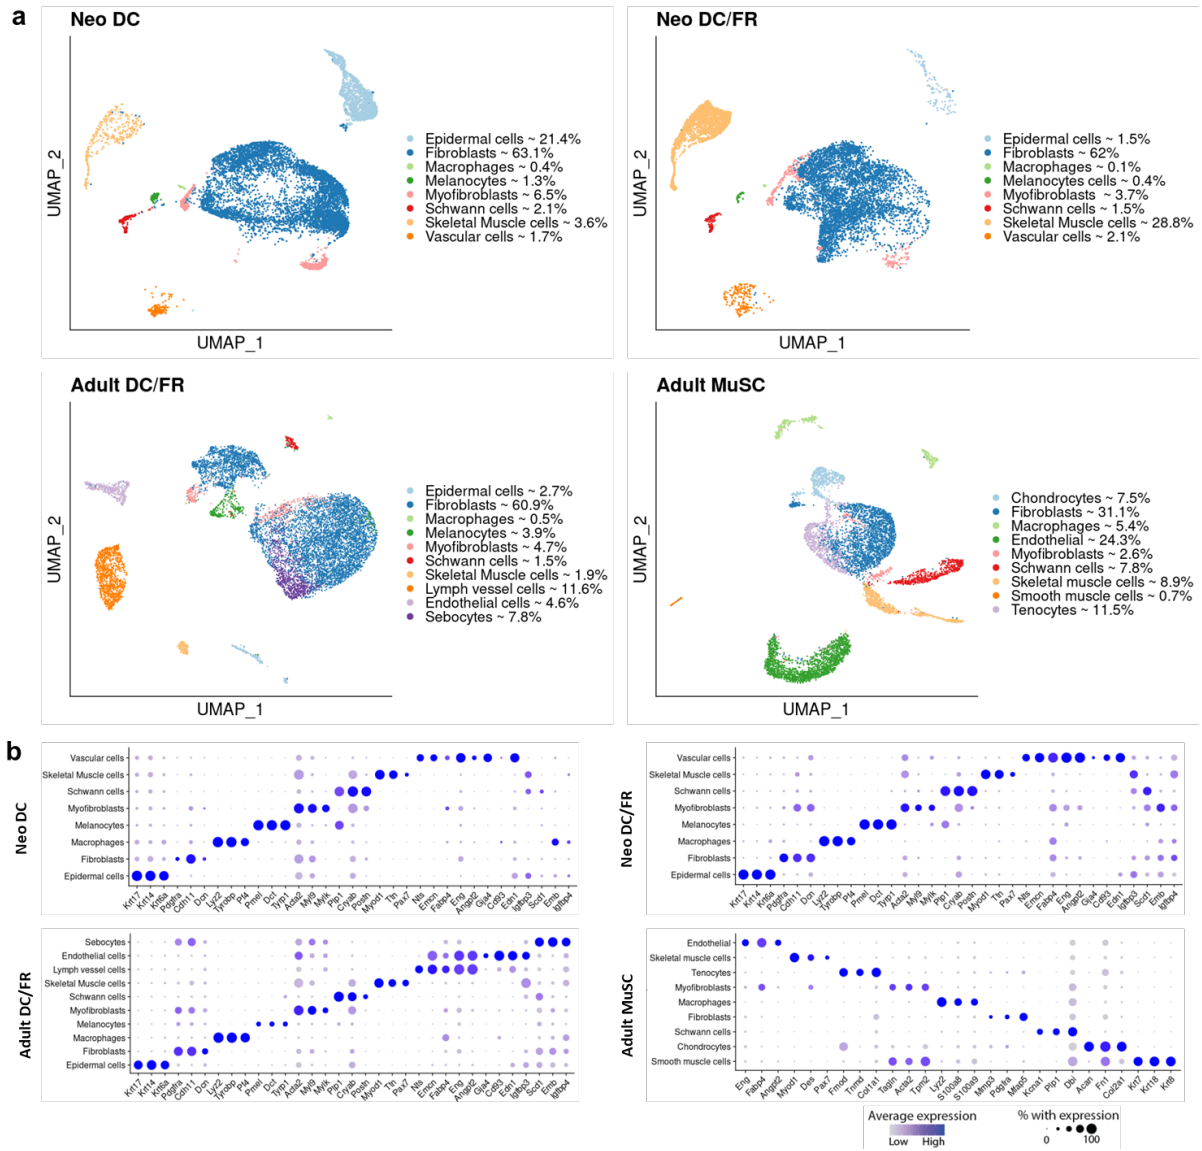

**Fig. S11 | scRNA-seq analysis of chemical-treated dermal cells and endogenous MuSCs. a**, UMAP plot showing the integration of the neo DC, neo DC/FR, adult DC/FR and adult MuSC. Numbers indicate cell percentage in total cells. **b**, Marker genes used for identifying the different cell clusters.

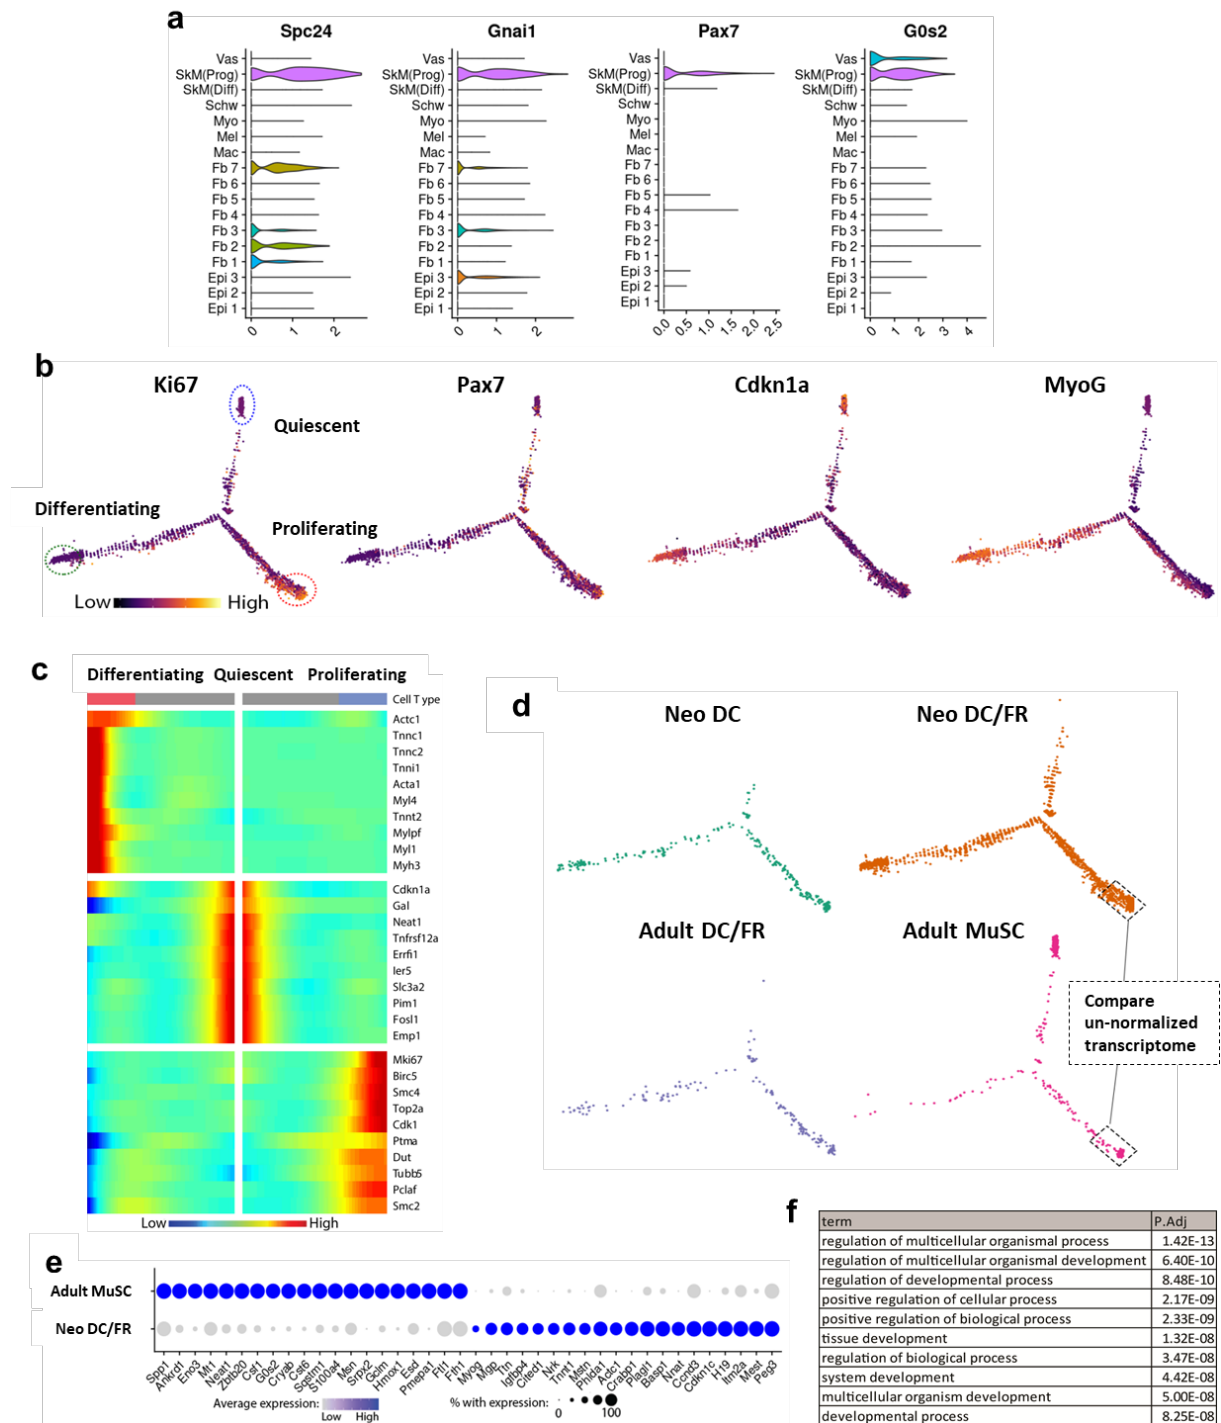

**Fig. S12 | scRNA-seq analysis reveals heterogeneous cell identities.** **a**, Identification of other marker genes for Pax7<sup>+</sup> cell clusters in neonatal dermal cells. Neonatal dermal cells were clustered with higher resolution, and differential gene expression test was performed between the Pax7<sup>+</sup> cell clusters with other cell clusters, and identified another 3 genes that were highly expressed in Pax7<sup>+</sup> cell clusters. Vas: Vascular cells, Skm(Prog): Skeletal muscle progenitor cells, Skm(Diff): Skeletal muscle differentiating cells, Schw: Schwann cells, Myo: Myofibroblasts, Mel: Melanocytes, Mac: Macrophages, Fb1-7: 7 sub-clusters of fibroblasts, Epi 1-3: 3 sub-clusters of epidermal cells. **b**, Pseudotime analysis of myogenic cells from all samples. The color gradient indicates the expression level of the respective genes along pseudotime trajectory. **c**, Heatmap showing upregulated genes in the differentiating, quiescent and proliferating myogenic cells. **d**, Pseudotime trajectory broken down into the respective samples. Cells from early pseudotime were identified and their un-normalized gene expression data were tested for differential expression testing. **e**, Top 20 up and down-regulated gene identified from in Neo DC/FR and endogenous adult MuSC. **f**, Gene ontology biological process terms enriched for the differentially expressed genes of Neo DC/FR and endogenous adult MuSC.

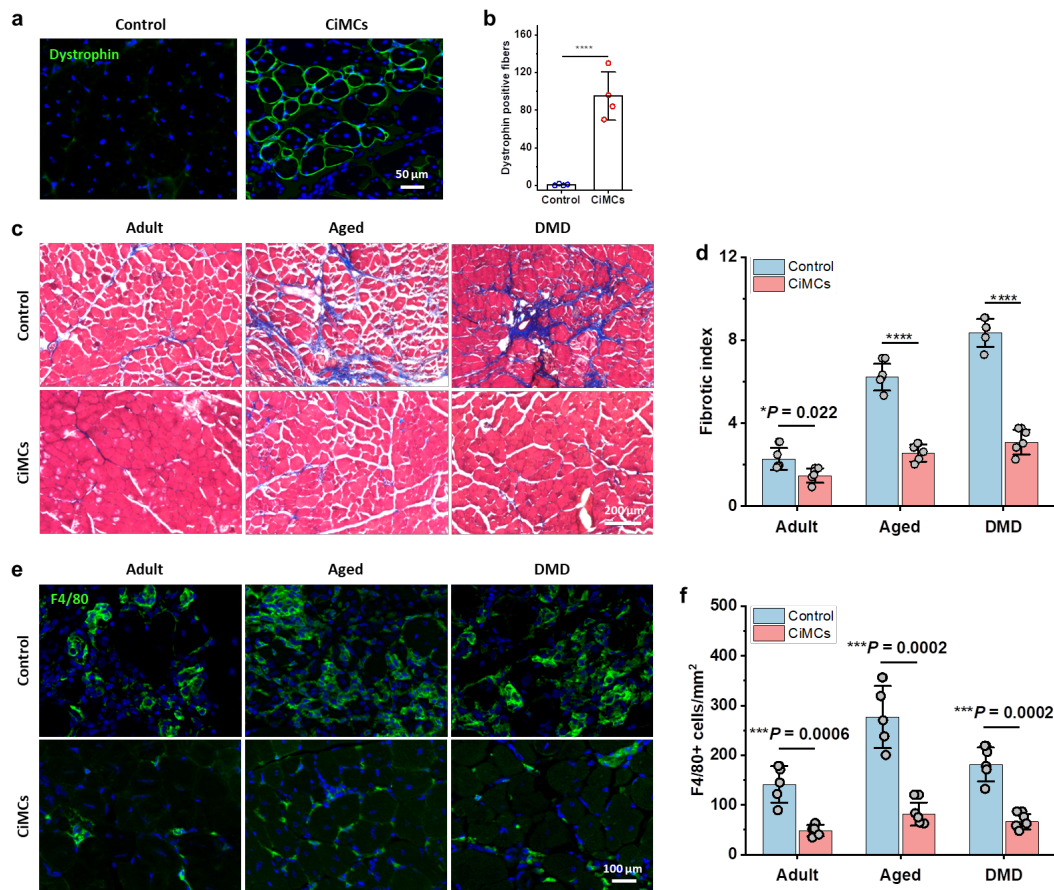

**Fig. S13 | *In vivo* analysis of CiMCs transplantation in CTX-injured adult, aged and mdx mice.** **a**, Dystrophin expression in dermal cells (negative control) and CiMCs implanted in mdx TA muscles for 4 weeks ( $n=4$  mice per group). **b**, The amount of dystrophin<sup>+</sup> fibers in **(a)** ( $n=4$  mice per group). **c**, Representative images of Masson Trichrome stained sections in adult, aged and mdx TA muscles treated with control cells or CiMCs for 4 weeks. **d**, Quantification of the fibrotic index. The fibrotic index was derived as the area of fibrosis divided by the total area of muscle, normalized to untreated normal muscle ( $n=5$  mice per group). **e**, Macrophage staining with F4/80 in adult, aged and mdx TA muscles at 4 weeks after CiMC transplantation. **f**, Quantification of F4/80 expressing cells in adult, aged and mdx TA muscles at 4 weeks after CiMC transplantation ( $n=5$  mice per group). Data are presented as mean  $\pm$  SD. Two-tailed Student's t-test.  $*P < 0.05$ ,  $***P < 0.001$  and  $****P < 0.0001$ .

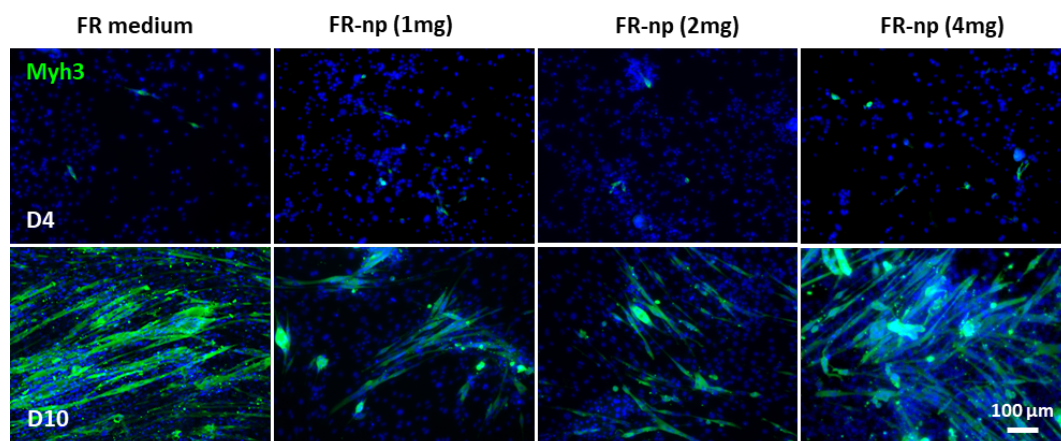

**Fig. S14 | Drug-loaded nanoparticles induce *in vitro* myogenesis.** Immunofluorescence staining for Myh3 in SACs treated with different doses of FR-np. All the experiments were performed in triplicate.

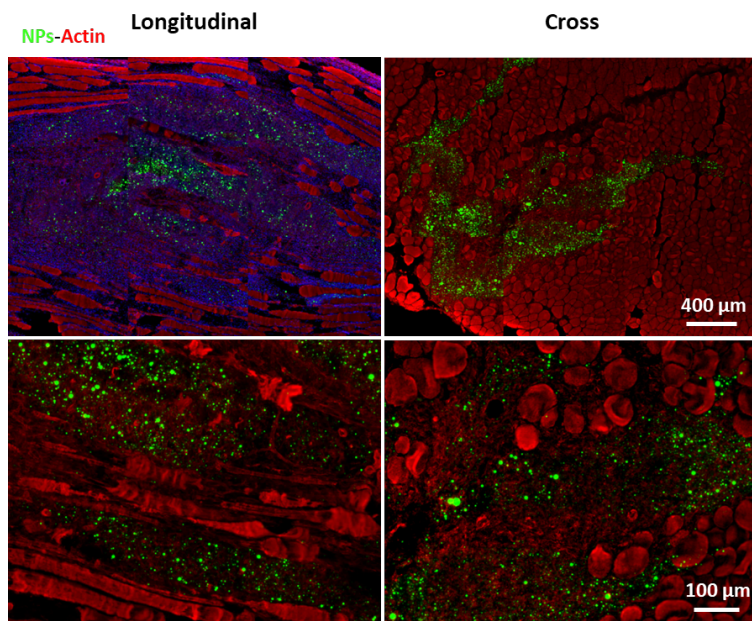

**Fig. S15 | Nanoparticle distribution in TA muscles after injection.** Immunofluorescent images show the distribution of green fluorescence-labeled nanoparticles (NPs) in longitudinal and cross-sections of TA muscles 2 days after injection. All the experiments were performed in triplicate.

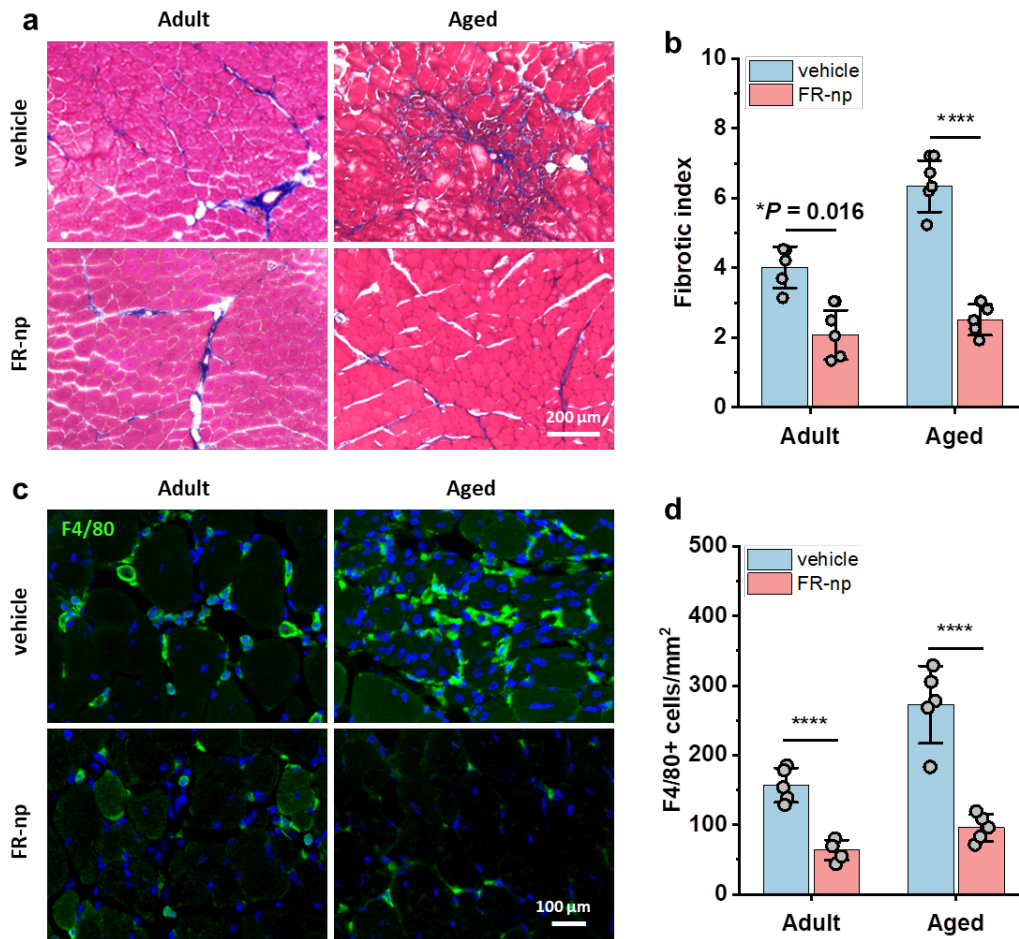

**Fig. S16 | FR-np promotes muscle regeneration by suppressing fibrosis and inflammation.** **a**, Representative images of Masson Trichrome stained sections in adult and aged TA muscles treated with vehicle or FR-np for 4 weeks. Vehicle refers to np without drugs and served as a control. **b**, Quantification of the fibrotic index for conditions indicated in (**a**). The fibrotic index is calculated as the area of fibrosis divided by the total area of muscle, normalized to untreated normal muscle ( $n = 5$  mice per group). **c**, Macrophage staining with F4/80 in adult and aged TA muscles treated with or without FR-np for 4 weeks. **d**, Quantification of F4/80 expressing cells in adult and aged TA muscles treated with or without FR-np for 4 weeks ( $n = 5$  mice per group). Data are presented as mean  $\pm$  SD. Two-tailed Student's t-test. \* $P < 0.05$  and \*\*\*\* $P < 0.0001$ .

**Supplementary Table S1 | Primer sequences for RT-qPCR analysis.**

| <b>Gene</b>     | <b>Forward</b>        | <b>Reverse</b>          |
|-----------------|-----------------------|-------------------------|
| <i>Pax7</i>     | CGTAAGCAGGCAGGAGCTAA  | ACTGTGCTGCCTCCATCTTG    |
| <i>Mrf5</i>     | AAGGCTCCTGTATCCCCTCAC | TGACCTTCTTCAGGCGTCTAC   |
| <i>MyoD</i>     | CTGCTCTGATGGCATGATGGA | CACTGTAGTAGGCGGTGTCG    |
| <i>Mymk</i>     | TTCCTCCCGACAGTGAGCAT  | GCACAGCACAGACAAACCAG    |
| <i>MyoG</i>     | GTGCCCAGTGAATGCAACTC  | CGAGCAAATGATCTCCTGGGT   |
| <i>Myh3</i>     | CTCTGTCACAGTCAGAGGTGT | TTCCGACTTGCGGAGGAAAG    |
| <i>Nanog</i>    | TCTTCCTGGTCCCCACAGTTT | GCAAGAATAGTTCTCGGGATGAA |
| <i>Oct4</i>     | GGCTTCAGACTTCGCCTCC   | AACCTGAGGTCCACAGTATGC   |
| <i>AggreCAN</i> | CCTGCTACTTCATCGACCCC  | AGATGCTGTTGACTCGAACCT   |
| <i>Pparg</i>    | TCGCTGATGCACTGCCTATG  | GAGAGGTCCACAGAGCTGATT   |
| <i>Runx2</i>    | AACGATCTGAGATTTGTGGGC | CCTGCGTGGGATTTCTTGGTT   |
| <i>Hand2</i>    | CACCAGCTACATCGCCTACC  | TCTCATTAGCTCTTTCTTCTCT  |
| <i>B2M</i>      | CTCGGTGACCCTGGTCTTTC  | TTGAGGGGTTTTCTGGATAGCA  |

**Supplementary video S1.** Spontaneous beating of CiMC myotube derived from dermal cells treated with FR medium for 4 days.

**Supplementary video S2.** Spontaneous beating of CiMC myotube derived from dermal cells treated with FR medium for 8 days.

**Supplementary video S3.** Spontaneous beating of CiMC myotube derived from dermal cells treated with FR medium for 14 days.

**Supplementary video S4.** Spontaneous beating of CiMC myotube derived from dermal cells treated with FR medium for 16 days.
